# Supplementary material for: Association between Prehospital Hypoxemia and Admission to Intensive Care Unit during the COVID-19 Pandemic: A Retrospective Cohort Study
Source: MDPI journal article supplement (doi:10.3390/medicina57121362), 2021-12-14
Supplement: s1 [file s1]

**Table S1:** ICU fast-track admission criteria (adapted from [4,11])

|                        |                                                                                                                                                                                                                                                                                 |
|------------------------|---------------------------------------------------------------------------------------------------------------------------------------------------------------------------------------------------------------------------------------------------------------------------------|
| ICU admission criteria | <p>Requirement for invasive ventilatory support</p> <ul style="list-style-type: none"> <li>- prehospital intubation</li> <li>- an arterial oxygen saturation (SaO<sub>2</sub>) &lt;90% on oxygen (O<sub>2</sub>) with persistent signs of respiratory insufficiency.</li> </ul> |
| Exclusion criteria     | Patient's wishes (advance directive, etc.)                                                                                                                                                                                                                                      |
|                        | Unwitnessed cardiac arrest, recurrent cardiac arrest, cardiac arrest with no return of spontaneous circulation                                                                                                                                                                  |
|                        | Malignant disease with a life expectancy of less than 12 months                                                                                                                                                                                                                 |
|                        | End-stage neurodegenerative disease                                                                                                                                                                                                                                             |
|                        | Severe and irreversible neurological event or condition                                                                                                                                                                                                                         |
|                        | <p>Chronic condition:</p> <ul style="list-style-type: none"> <li>- NYHA class IV heart failure</li> <li>- COPD GOLD 4 (D)</li> <li>- Liver cirrhosis, Child-Pugh score &gt;8</li> <li>- Severe dementia</li> </ul>                                                              |
|                        | <p>Severe circulatory failure, treatment-resistant despite increased vasoactive dose</p> <p>(hypotension and/or persistent inadequate organ perfusion)</p>                                                                                                                      |
|                        | Estimated survival <12 months                                                                                                                                                                                                                                                   |
